# Supplementary material for: In-Hospital Mortality among Ischemic Stroke Patients in Gondar University Hospital: A Retrospective Cohort Study
Source: Hindawi journal article supplement (doi:10.1155/2019/7275063), 2019-01-01
Supplement: f1 [file 7275063.f1.pdf]

**Supplementary material: Potential causes of in-hospital mortality among ischemic stroke patients**

| <b>Potential causes of in-hospital mortality</b>                                                                           | <b>Number of patients (N=26)</b> |
|----------------------------------------------------------------------------------------------------------------------------|----------------------------------|
| Uncrossed hemiplegia secondary to IS + aspiration pneumonia                                                                | 4                                |
| Uncrossed hemiplegia secondary to CE IS + AF                                                                               | 3                                |
| Uncrossed hemiplegia secondary to IS + grade IV bed sore                                                                   | 1                                |
| Uncrossed hemiplegia + aspiration pneumonia + HAP                                                                          | 1                                |
| Uncrossed hemiplegia secondary to IS + Broca's aphasia                                                                     | 1                                |
| Uncrossed hemiplegia secondary to IS + Global aphasia                                                                      | 1                                |
| Uncrossed hemiplegia secondary to CE IS + AF + aspiration pneumonia + Killip's class III ACS                               | 1                                |
| Uncrossed hemiplegia secondary to CE IS                                                                                    | 1                                |
| Uncrossed hemiplegia secondary to IS with hemorrhagic transformation                                                       | 1                                |
| Uncrossed hemiparesis secondary to CE IS with hemorrhagic transformation + AF+ aspiration pneumonia                        | 1                                |
| Uncrossed hemiparesis secondary to IS + Broca's aphasia + aspiration pneumonia                                             | 1                                |
| Uncrossed hemiparesis secondary to IS                                                                                      | 1                                |
| Uncrossed hemiparesis secondary to IS + aspiration pneumonia                                                               | 1                                |
| Uncrossed hemiparesis secondary to IS + Broca's aphasia                                                                    | 1                                |
| Uncrossed spastic hemiparesis secondary to IS + Broca's aphasia + aspiration pneumonia                                     | 1                                |
| Uncrossed hemiplegia secondary to IS + NYHA class IV stage C CHF secondary to core pulmonale + COPD + aspiration pneumonia | 1                                |
| Coma secondary to IS + aspiration pneumonia + HAP                                                                          | 1                                |
| Coma secondary to Uncrossed hemiplegia secondary to IS                                                                     | 1                                |
| Coma secondary to crossed flaccid left sided hemiplegia secondary to CE IS                                                 | 1                                |
| Coma secondary to Uncrossed hemiplegia secondary to CE IS + AF + aspiration pneumonia                                      | 1                                |
| Coma secondary to Uncrossed hemiparesis secondary to IS + Broca's aphasia + aspiration pneumonia                           | 1                                |

*Note: ACS: Acute Coronary Syndrome, AF: Atrial Fibrillation, CE: Cardioembolic, CHF: Congestive Heart Failure, COPD: Chronic Obstructive Pulmonary Disease, HAP: Hospital-Acquired Pneumonia, IS: Ischemic Stroke, NYHA: New York Heart Association, UTI: Urinary Tract Infection,*
